# Supplementary material for: Risk and protective factors associated with mental health among female military veterans: results from the veterans’ health study
Source: PubMed Central journal article supplement (PMC7869200; doi:10.1186/s12905-021-01181-z), 2021-02-08
Supplement: 12905_2021_1181_MOESM2_ESM.pdf [file 12905_2021_1181_MOESM2_ESM.pdf]

# Veteran Status Questionnaire

Name: \_\_\_\_\_

In order to better serve healthcare needs, the Geisinger Health System is incorporating veteran status into its healthcare records. We have a few questions to ask you. **Please return to receptionist when completed.**

Please complete one of the sections below for EACH period you served on active duty or were deployed in the US Armed Services.

## Most Recent Period

1. Served from: \_\_\_\_\_ (Month/Year) Served to: \_\_\_\_\_ (Month/Year)
2. What service branch did you serve in during this period of active duty or deployment? (check one)  
 US Army  US Navy  US Marines  US Air Force  US Coast Guard  Unknown
3. During this period of active duty or deployment were you a member of the National Guard or the Reserves?  
 Yes  No  Unknown
4. Did you serve in a war zone or see combat during this period of active duty or deployment?  
 Yes  No  Unknown
5. If "Yes" to question 4, which combat or war zone did you serve in during this active duty or deployment?  
 World War II in Pacific or Europe (1940-1946)  Korea (1950-1955)  Vietnam (1960-1975)  
 Persian Gulf (1990-1992)  Iraq/Afghanistan (2001-2009)  Other: \_\_\_\_\_  
 Unknown

## Second Most Recent Period (If applicable)

1. Served from: \_\_\_\_\_ (Month/Year) Served to: \_\_\_\_\_ (Month/Year)
2. What service branch did you serve in during this period of active duty or deployment? (check one)  
 US Army  US Navy  US Marines  US Air Force  US Coast Guard  Unknown
3. During this period of active duty or deployment were you a member of the National Guard or the Reserves?  
 Yes  No  Unknown
4. Did you serve in a war zone or see combat during this period of active duty or deployment?  
 Yes  No  Unknown
5. If "Yes" to question 4, which combat or war zone did you serve in during this active duty or deployment?  
 World War II in Pacific or Europe (1940-1946)  Korea (1950-1955)  Vietnam (1960-1975)  
 Persian Gulf (1990-1992)  Iraq/Afghanistan (2001-2009)  Other: \_\_\_\_\_  
 Unknown

## Third Most Recent Period (If applicable)

1. Served from: \_\_\_\_\_ (Month/Year) Served to: \_\_\_\_\_ (Month/Year)
2. What service branch did you serve in during this period of active duty or deployment? (check one)  
 US Army  US Navy  US Marines  US Air Force  US Coast Guard  Unknown
3. During this period of active duty or deployment were you a member of the National Guard or the Reserves?  
 Yes  No  Unknown
4. Did you serve in a war zone or see combat during this period of active duty or deployment?  
 Yes  No  Unknown
5. If "Yes" to question 4, which combat or war zone did you serve in during this active duty or deployment?  
 World War II in Pacific or Europe (1940-1946)  Korea (1950-1955)  Vietnam (1960-1975)  
 Persian Gulf (1990-1992)  Iraq/Afghanistan (2001-2009)  Other: \_\_\_\_\_  
 Unknown

**Thank you very much for providing this information and for your service to the country. This information will be helpful in better serving your healthcare needs.**
